# Supplementary material for: Novel B cell-dependent multiple sclerosis model using extracellular domains of myelin proteolipid protein
Source: PubMed Central journal article supplement (PMC7081236; doi:10.1038/s41598-020-61928-w), 2020-03-19
Supplement: 41598_2020_61928_MOESM1_ESM.pdf [file 41598_2020_61928_MOESM1_ESM.pdf]

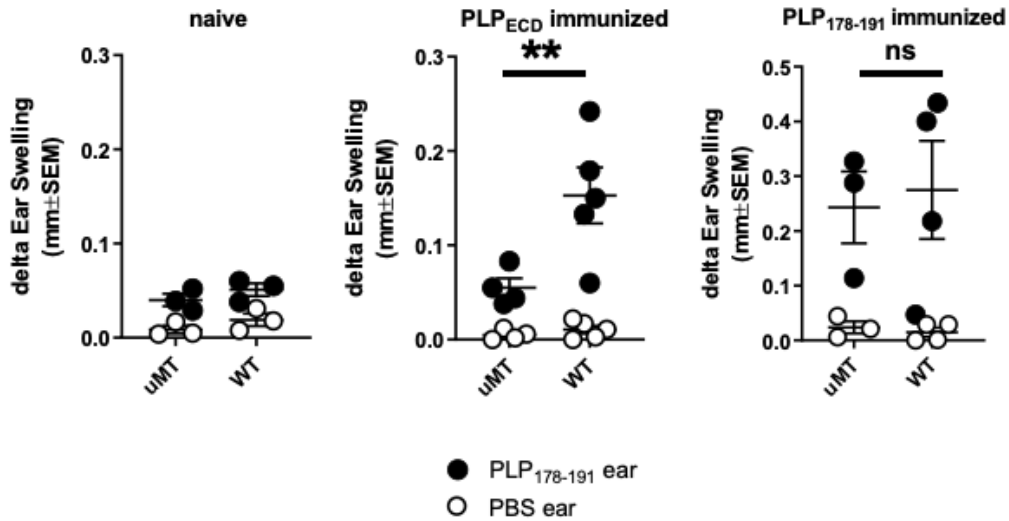

**Supplementary Figure 1. PLP<sub>178-191</sub>-driven DTH is impaired in PLP<sub>ECD</sub>-immunized but not PLP<sub>178-191</sub>-immunized  $\mu$ MT mice.** Groups of WT and  $\mu$ MT mice were immunized s.c. with either 100 $\mu$ g of PLP<sub>178-191</sub>/CFA or PLP<sub>ECD</sub>/CFA on day 0. Twenty days later, naïve or immune mice were challenged with PLP<sub>178-191</sub> or PBS alone in right and left ear pinnae, respectively. Ears were measured at 48h. ns = not significant; \*\* p < 0.01.
